# Supplementary material
Source: publisher figshare collection journal article supplement (https://frontiersin.figshare.com/ndownloader/files/17852840)
Supplement: Supplementary file 1 [file 17852840]

## Jonas' experimental approach

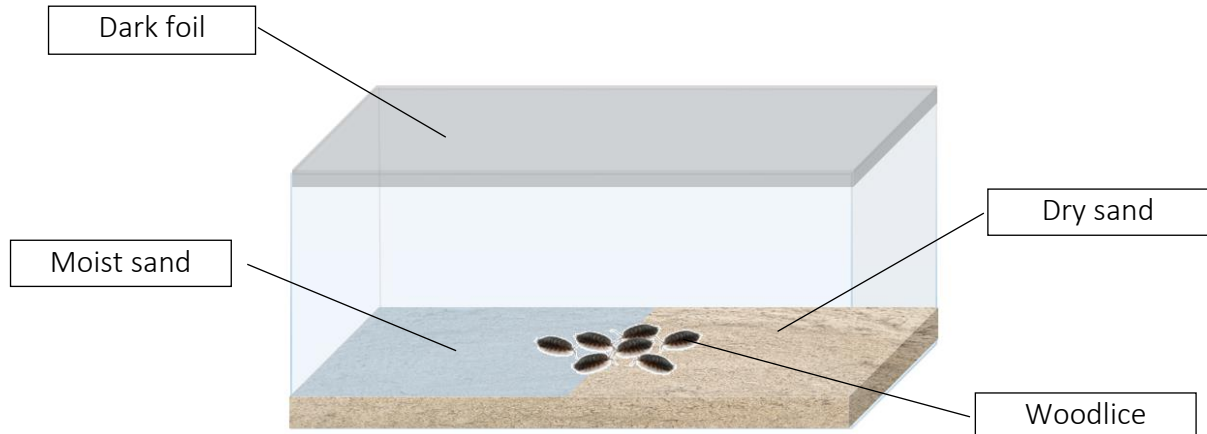

## Task 5

(P\_Ass\_F\_MC)

- ☐ The foil creates different light ratios in the container.
- ☐ Woodlice prefer dark habitats.
- ☐ Woodlice prefer moist habitats.
- ☐ The temperature differs between the two halves of the container.

## Task 6

(P\_Ass\_F\_O)

[illegible]

## Jonas' experimental approach

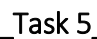

(E1\_Ass\_L\_MC)

- ☐ Woodlice prefer moist habitats.
- ☐ Woodlice prefer dark habitats.
- ☐ Woodlice prefer dry habitats.
- ☐ Woodlice prefer cool habitats.

## Task 6

(E1\_Ass\_L\_O)

[illegible]

The diagram illustrates Jonas' experimental approach. It shows a rectangular glass tank. The top surface of the tank is covered with a grey layer labeled "Dark foil". The bottom of the tank is filled with a layer of brown material labeled "Sand". A group of small, dark, oval-shaped organisms, labeled "Woodlice", are clustered on the sand. A black heating rod is inserted into the right side of the tank, with its tip submerged in the sand. A label "Heating rod" points to the device. The title "Jonas' experimental approach" is centered above the tank.

(E2\_Ass\_W\_MC)

- ☐ Woodlice prefer moist habitats.
- ☐ Woodlice prefer dark habitats.
- ☐ Woodlice prefer dry habitats.
- ☐ Woodlice prefer cool habitats.

(E2\_Ass\_W\_O)

[illegible]
